# Supplementary material
Source: PubMed Central journal article supplement (PMC9663149)
Supplement: mmc1.pdf [file mmc1.pdf]

## Supplementary material

# Quaternary Ammonium Compounds of Emerging Concern: Classification, Occurrence, Fate, Toxicity and Antimicrobial Resistance

Sanjeeb Mohapatra<sup>1,2</sup>, Lin Yutao<sup>1</sup>, Shin Giek Goh<sup>1,2</sup>, Charmaine Ng<sup>1,2</sup>, You Luhua<sup>1,2</sup>, Ngoc Han Tran<sup>1,2</sup>, Karina Yew-Hoong Gin<sup>1,2,3\*</sup>

<sup>1</sup>NUS Environmental Research Institute, National University of Singapore, Singapore 117411

<sup>2</sup>Energy & Environmental Sustainability Solutions for Megacities, CREATE, Create way, Create 8 Tower, #15-02, Singapore 138602

<sup>3</sup>Department of Civil & Environmental Engineering, National University of Singapore, Engineering Drive 2, Singapore 117576

\* Corresponding author, Tel: +65 6516 8104, email: ceeginyh@nus.edu.sg

**Table S1: Acronym, molecular mass and formula of QACs**

| Name                                              | Acronym             | Molecular Mass | Formula                                                                                          |
|---------------------------------------------------|---------------------|----------------|--------------------------------------------------------------------------------------------------|
| Dialkyldimethylammonium compounds (DADMACs)       |                     |                |                                                                                                  |
| Dioctyldimethylammonium bromide                   | DADMAC C8           | 350            | $[\text{CH}_3(\text{CH}_2)_7]_2\text{N}(\text{CH}_3)_2 \text{Br}$                                |
| Didecyldimethylammonium chloride                  | DADMAC C10          | 362            | $[\text{CH}_3(\text{CH}_2)_9]_2\text{N}(\text{CH}_3)_2 \text{Cl}$                                |
| Didodecyldimethylammonium chloride                | DADMAC C12          | 418            | $[\text{CH}_3(\text{CH}_2)_{11}]_2\text{N}(\text{CH}_3)_2 \text{Cl}$                             |
| Ditetradecyldimethylammonium bromide              | DADMAC C14          | 518            | $[\text{CH}_3(\text{CH}_2)_{13}]_2\text{N}(\text{CH}_3)_2 \text{Br}$                             |
| Dihexadecyldimethylammonium bromide               | DADMAC C16          | 574            | $[\text{CH}_3(\text{CH}_2)_{15}]_2\text{N}(\text{CH}_3)_2 \text{Br}$                             |
| Diocetadecyldimethylammonium chloride             | DADMAC C18 (DODMAC) | 586            | $[\text{CH}_3(\text{CH}_2)_{17}]_2\text{N}(\text{CH}_3)_2 \text{Cl}$                             |
| Alkyltrimethylammonium compounds (ATMACs)         |                     |                |                                                                                                  |
| Dodecyltrimethylammonium chloride                 | ATMAC C12 (DTAC)    | 264            | $\text{CH}_3(\text{CH}_2)_{11}\text{N}(\text{CH}_3)_3 \text{Cl}$                                 |
| Tetradecyltrimethylammonium chloride              | ATMAC C14 (TTAC)    | 292            | $\text{CH}_3(\text{CH}_2)_{13}\text{N}(\text{CH}_3)_3 \text{Cl}$                                 |
| Hexadecyltrimethylammonium chloride               | ATMAC C16 (CTAC)    | 320            | $\text{CH}_3(\text{CH}_2)_{15}\text{N}(\text{CH}_3)_3 \text{Cl}$                                 |
| Octadecyltrimethylammonium chloride               | ATMAC C18 (OTAC)    | 348            | $\text{CH}_3(\text{CH}_2)_{17}\text{N}(\text{CH}_3)_3 \text{Cl}$                                 |
| Benzylalkyldimethylethylammonium compounds (BACs) |                     |                |                                                                                                  |
| Dodecylbenzyltrimethylammonium chloride           | BAC C12             | 339            | $\text{CH}_3(\text{CH}_2)_{11}\text{N}(\text{Cl})(\text{CH}_3)_2\text{CH}_2\text{C}_6\text{H}_5$ |
| Tetradecylbenzyltrimethylammonium chloride        | BAC C14             | 368            | $\text{CH}_3(\text{CH}_2)_{13}\text{N}(\text{Cl})(\text{CH}_3)_2\text{CH}_2\text{C}_6\text{H}_5$ |
| Hexadecylbenzyltrimethylammonium chloride         | BAC C16             | 396            | $\text{CH}_3(\text{CH}_2)_{15}\text{N}(\text{Cl})(\text{CH}_3)_2\text{CH}_2\text{C}_6\text{H}_5$ |
| Octadecylbenzyltrimethylammonium chloride         | BAC C18             | 424            | $\text{CH}_3(\text{CH}_2)_{17}\text{N}(\text{Cl})(\text{CH}_3)_2\text{CH}_2\text{C}_6\text{H}_5$ |

Reused with permission from (Zhang et al., 2015)

**Table S2: List of disinfectants with QACs as active ingredients against SARS-CoV-2 with less than 1 minute contact time (Ref: <https://cfpub.epa.gov/wizards/disinfectants/>; accessed on 27 December 2021)**

| EPA Registration Number | Active Ingredient(s)                                                          | Product Name                                                           | Contact Time (in minutes) | Formulation Type | Use Site                               |
|-------------------------|-------------------------------------------------------------------------------|------------------------------------------------------------------------|---------------------------|------------------|----------------------------------------|
| 10324-85                | Quaternary ammonium                                                           | Maquat 86-M                                                            | 1                         | Ready-to-use     | Healthcare; Institutional; Residential |
| 1839-175                | Quaternary ammonium                                                           | Solvent Free Detergent Disinfectant Pump Spray                         | 0.5                       | Ready-to-use     | Healthcare; Institutional; Residential |
| 1839-190                | Quaternary ammonium                                                           | Stepan Disinfectant Wipe                                               | 0.5                       | Wipe             | Healthcare; Institutional; Residential |
| 1839-220                | Quaternary ammonium                                                           | SC-RTU Disinfectant Cleaner                                            | 0.5                       | Ready-to-use     | Healthcare; Institutional; Residential |
| 1839-83                 | Quaternary ammonium                                                           | Detergent Disinfectant Pump Spray                                      | 1                         | Ready-to-use     | Healthcare; Institutional; Residential |
| 1839-86                 | Quaternary ammonium                                                           | BTC 2125M 10% Solution                                                 | 0.5                       | Dilutable        | Healthcare; Institutional; Residential |
| 4091-20                 | Quaternary ammonium                                                           | Phoenix 2                                                              | 1                         | Ready-to-use     | Healthcare; Institutional; Residential |
| 4091-21                 | Quaternary ammonium                                                           | Condor 2                                                               | 1                         | Ready-to-use     | Healthcare; Institutional; Residential |
| 4091-26                 | Quaternary ammonium                                                           | Emu                                                                    | 1                         | Ready-to-use     | Healthcare; Institutional; Residential |
| 42182-13                | Quaternary ammonium; Ethanol (Ethyl alcohol)                                  | Ironman Wipe                                                           | 0.1                       | Wipe             | Healthcare; Institutional; Residential |
| 42182-9                 | Quaternary ammonium; Ethanol (Ethyl alcohol)                                  | Firebird F130                                                          | 0.1                       | Ready-to-use     | Healthcare; Institutional; Residential |
| 46781-12                | Quaternary ammonium; Ethanol (Ethyl alcohol); Isopropanol (Isopropyl alcohol) | Cavicide 1                                                             | 1                         | Ready-to-use     | Healthcare; Institutional; Residential |
| 46781-13                | Quaternary ammonium; Ethanol (Ethyl alcohol); Isopropanol (Isopropyl alcohol) | Caviwipes 1                                                            | 1                         | Wipe             | Healthcare; Institutional; Residential |
| 47371-129               | Quaternary ammonium                                                           | Formulation HWS- 256                                                   | 1                         | Dilutable        | Healthcare; Institutional; Residential |
| 47371-130               | Quaternary ammonium                                                           | Formulation HWS-128                                                    | 1                         | Dilutable        | Healthcare; Institutional; Residential |
| 47371-131               | Quaternary ammonium                                                           | HWS-64                                                                 | 1                         | Dilutable        | Healthcare; Institutional; Residential |
| 47371-192               | Quaternary ammonium                                                           | Formulation HWS-32                                                     | 1                         | Dilutable        | Institutional; Residential             |
| 5813-113                | Quaternary ammonium                                                           | CDW                                                                    | 0.25                      | Wipe             | Institutional; Residential             |
| 5813-73                 | Quaternary ammonium                                                           | Clorox Everest                                                         | 0.5                       | Ready-to-use     | Institutional; Residential             |
| 5813-79                 | Quaternary ammonium                                                           | Clorox Disinfecting Wipes                                              | 0.25                      | Wipe             | Healthcare; Institutional; Residential |
| 67619-10                | Quaternary ammonium                                                           | Clorox Commercial Solutions Formula 409 Cleaner Degreaser Disinfectant | 0.5                       | Dilutable        | Healthcare; Institutional; Residential |
| 67619-31                | Quaternary ammonium                                                           | Clorox Commercial Solutions® Clorox® Disinfecting Wipes                | 0.25                      | Wipe             | Healthcare; Institutional; Residential |
| 67619-37                | Quaternary ammonium                                                           | Clorox Healthcare® VersaSure® Wipes                                    | 0.5                       | Wipe             | Healthcare; Institutional; Residential |
| 67619-43                | Quaternary ammonium                                                           | Libertad                                                               | 0.5                       | Wipe             | Healthcare; Institutional; Residential |

|          |                                                                                  |                                             |   |              |                                        |
|----------|----------------------------------------------------------------------------------|---------------------------------------------|---|--------------|----------------------------------------|
| 6836-136 | Quaternary ammonium                                                              | Lonza Formulation S-18F                     | 1 | Dilutable    | Healthcare; Institutional; Residential |
| 6836-138 | Quaternary Ammonium Compounds                                                    | Lonza Formulation S-38-F                    | 1 | Dilutable    | Institutional; Residential             |
| 6836-139 | Quaternary ammonium                                                              | Lonza Formulation R-82F                     | 1 | Dilutable    | Healthcare; Institutional; Residential |
| 6836-140 | Quaternary ammonium                                                              | Lonza Formulation S-21F                     | 1 | Dilutable    | Healthcare; Institutional; Residential |
| 6836-152 | Quaternary ammonium                                                              | Lonza Formulation DC-103                    | 1 | Ready-to-use | Healthcare; Institutional; Residential |
| 6836-346 | Quaternary ammonium                                                              | Lonzagard RCS-256                           | 1 | Dilutable    | Healthcare; Institutional; Residential |
| 6836-347 | Quaternary ammonium                                                              | Lonzagard RCS-128                           | 1 | Dilutable    | Healthcare; Institutional; Residential |
| 6836-348 | Quaternary ammonium                                                              | Lonzagard RCS-128 PLUS                      | 1 | Dilutable    | Healthcare; Institutional; Residential |
| 6836-349 | Quaternary ammonium                                                              | Lonzagard RCS-256 Plus                      | 1 | Dilutable    | Healthcare; Institutional; Residential |
| 6836-361 | Quaternary ammonium                                                              | Nugen MB5A-256                              | 1 | Dilutable    | Healthcare; Institutional; Residential |
| 6836-362 | Quaternary ammonium                                                              | Nugen MB5A-128                              | 1 | Dilutable    | Healthcare; Institutional; Residential |
| 6836-363 | Quaternary ammonium                                                              | Nugen MB5A-64                               | 1 | Dilutable    | Healthcare; Institutional; Residential |
| 6836-381 | Quaternary ammonium                                                              | Lonzagard R-82G                             | 1 | Dilutable    | Healthcare; Institutional; Residential |
| 6836-73  | Quaternary Ammonium Compounds                                                    | Lonza Formulation S-38                      | 1 | Dilutable    | Institutional; Residential             |
| 6836-75  | Quaternary ammonium                                                              | Lonza Formulation S-21                      | 1 | Dilutable    | Healthcare; Institutional; Residential |
| 6836-77  | Quaternary ammonium                                                              | Lonza Formulation S-18                      | 1 | Dilutable    | Healthcare; Institutional; Residential |
| 6836-78  | Quaternary ammonium                                                              | Lonza Formulation R-82                      | 1 | Dilutable    | Healthcare; Institutional; Residential |
| 70144-4  | Quaternary ammonium; Ethanol (Ethyl alcohol)                                     | Opti-cide Max Wipes                         | 1 | Wipe         | Healthcare; Institutional; Residential |
| 70144-5  | Quaternary ammonium; Ethanol (Ethyl alcohol)                                     | Opti-cide Max                               | 1 | Ready-to-use | Healthcare; Institutional; Residential |
| 88897-1  | Quaternary ammonium; Ethanol (Ethyl alcohol);<br>Isopropanol (Isopropyl alcohol) | Panther Disinfectant Towelette              | 1 | Wipe         | Healthcare; Institutional              |
| 89833-3  | Quaternary ammonium                                                              | D7 Part 1                                   | 1 | Dilutable    | Healthcare; Institutional; Residential |
| 92378-2  | Quaternary ammonium                                                              | Atmosphere                                  | 1 | Dilutable    | Healthcare; Institutional; Residential |
| 9480-10  | Quaternary ammonium; Ethanol (Ethyl alcohol);<br>Isopropanol (Isopropyl alcohol) | Sani-Prime Germicidal Spray                 | 1 | Ready-to-use | Healthcare; Institutional              |
| 9480-11  | Quaternary ammonium                                                              | BackSpray RTU                               | 1 | Ready-to-use | Healthcare; Institutional; Residential |
| 9480-13  | Quaternary ammonium                                                              | Backspin No-Rinse FCSS                      | 1 | Wipe         | Healthcare; Institutional; Residential |
| 9480-4   | Quaternary ammonium; Isopropanol (Isopropyl alcohol)                             | Super Sani-Cloth Germicidal Disposable Wipe | 1 | Wipe         | Healthcare; Institutional              |
| 96706-1  | Quaternary ammonium; Isopropanol (Isopropyl alcohol)                             | MBS MedTech Germicidal* Disposable Wipes    | 1 | Wipe         | Healthcare; Institutional              |

**Table S3: Variation in the concentration of QACs before and during Covid19 in residential dust (Zheng et al., 2020)**

| QACs   |           | Before COVID-19 |       |         | During COVID-19 |        |        | Change (%) |
|--------|-----------|-----------------|-------|---------|-----------------|--------|--------|------------|
|        |           | Min             | Max   | Median  | Min             | Max    | Median |            |
| BACs   | C6-BAC    | <MDL            | 0.015 | 0.00171 | <MDL            | 0.084  | 0.004  | 134        |
|        | C8-BAC    | 0.0022          | 12.2  | 0.0496  | 0.0022          | 7.58   | 0.058  | 17         |
|        | C10-BAC   | 0.004           | 0.329 | 0.0213  | 0.0005          | 0.787  | 0.054  | 154        |
|        | C12-BAC   | 1.4             | 32.5  | 5.89    | 0.244           | 181    | 12.6   | 114        |
|        | C14-BAC   | 0.863           | 30.9  | 3.88    | 0.76            | 154    | 9.55   | 146        |
|        | C16-BAC   | 0.181           | 9.73  | 1.03    | 0.203           | 75.6   | 3.17   | 208        |
|        | C18-BAC   | 0.0393          | 6.07  | 0.431   | 0.061           | 34.8   | 1.16   | 169        |
|        | ∑BAC      | 3.19            | 74.2  | 14.2    | 1.66            | 421    | 27.1   | 91         |
| DDACs  | C8-DDAC   | 0.056           | 7.33  | 1.1     | 0.0148          | 20.2   | 1.63   | 48         |
|        | C10-DDAC  | 1.09            | 24.1  | 5.53    | 0.0219          | 32.8   | 4.3    | -22        |
|        | C12-DDAC  | <MDL            | 0.139 | 0.0495  | <MDL            | 2.91   | 0.047  | -5         |
|        | C14-DDAC  | <MDL            | 0.05  | 0.0147  | 0.0002          | 0.462  | 0.016  | 9          |
|        | C16-DDAC  | 0.0355          | 4.67  | 0.231   | 0.0031          | 4.24   | 0.374  | 62         |
|        | C18-DDAC  | 0.0809          | 22.1  | 1.71    | 0.0192          | 33.1   | 3.47   | 103        |
|        |           | ∑DDAC           | 1.35  | 41.4    | 8.87            | 0.0595 | 68.9   | 12.3       |
| ATMACs | C8-ATMAC  | 0.0007          | 0.253 | 0.0223  | <MDL            | 0.507  | 0.057  | 156        |
|        | C10-ATMAC | 0.0146          | 2.41  | 0.196   | <MDL            | 6.76   | 0.266  | 36         |
|        | C12-ATMAC | 0.0166          | 22.5  | 0.758   | 0.0281          | 13.1   | 1.25   | 65         |
|        | C14-ATMAC | <MDL            | 4.05  | 0.131   | 0.0034          | 2.51   | 0.275  | 110        |
|        | C16-ATMAC | 0.246           | 14    | 2.2     | 0.0116          | 61.3   | 4.59   | 109        |
|        | C18-ATMAC | 0.03            | 6.32  | 0.546   | 0.0096          | 9.8    | 0.841  | 54         |
|        |           | ∑ATMAC          | 0.698 | 26.1    | 6.36            | 0.235  | 66.5   | 8.78       |
|        | ∑QAC      | 6.55            | 127   | 36.3    | 1.95            | 531    | 58.9   | 62         |

**Table S4: Efficacy of QACs against different viruses**

| QACs                 | Concentration (% w/v) | Type of assay | Virus tested | Exposure Time | Viral Load reduction                           | effective viral load reduction (>99.9%)? (Y/N) | References              |
|----------------------|-----------------------|---------------|--------------|---------------|------------------------------------------------|------------------------------------------------|-------------------------|
| BAC                  | 0.04                  | QCT           | HCoV         | 1 min         | 3                                              | N                                              | (Sattar et al., 1989)   |
| BAC, HCl             | 0.04 (pH 1.0)         | QCT           | HCoV         | 1 min         | >3.0                                           | Y                                              |                         |
| BAC, EtOH            | 0.04, 70              | QCT           | HCoV         | 1 min         | >3.0                                           | Y                                              |                         |
| BAC                  | 0.2                   | suspension    | HCoV         | 10 min        | 0                                              | N                                              | (Wood and Payne, 1998)  |
| BAC                  | 1                     | suspension    | SARS-CoV     | 5–30 min      | Reduced growth; RNA still detectable by RT-PCR | Y                                              | (Ansaldi et al., 2004)  |
| Mikrobac Forte (BAC) | 0.5                   | suspension    | SARS-CoV     | 30, 60 min    | $\geq 6.13$                                    | Y                                              | (Rabenau et al., 2005)  |
| Kohrsolin FF (BAC)   | 0.5                   | suspension    | SARS-CoV     | 30, 60 min    | $\geq 3.75$                                    | Y                                              |                         |
| BAC                  | 0.01                  | suspension    | TGEV         | 5 min         | $\geq 3.0$                                     | Y                                              | (Schmidt et al., 2005)  |
| CG                   | 0.008                 | QCT           | HCoV 229E    | 5 min         | <3.0                                           | N                                              |                         |
| CG, EtOH             | 0.008, 70             | QCT           | HCoV229E     | 5 min         | $\geq 3.0$                                     | Y                                              |                         |
| mix of BAC/CG        | 0.066                 | QCT           | HCoV 229E    | 10 min        | 4                                              | Y                                              |                         |
| DDAC                 | 0.0025                | suspension    | CCoV         | 3 d           | >4.0                                           | Y                                              | (Pratelli, 2007)        |
| BAC                  | 0.00175               | suspension    | CCoV         | 3 d           | 3                                              | N                                              |                         |
| BAC, EtOH            | 0.1, 79               | suspension    | MHV          | 30 s          | $\geq 3.0$                                     | Y                                              | (Dellanno et al., 2009) |

Reused with permission from (Schrank et al., 2020)

**Table S5: Experimental conditions and % removal of different classes of QACs**

| Compounds  | Experiment conditions                                                                                                                                                   | % Removal          |                     | References           |
|------------|-------------------------------------------------------------------------------------------------------------------------------------------------------------------------|--------------------|---------------------|----------------------|
|            |                                                                                                                                                                         | Stage 1            | Stage 2             |                      |
| BAC C10    | Lab Scale: Two step sequential anaerobic-aerobic digestion experiment was conducted with real wastewater collected from a WWTP equipped with activated sludge treatment | 33.9               | 100                 | (Tomei et al., 2019) |
| BAC C12    |                                                                                                                                                                         | 27.4               | 77.3                |                      |
| BAC C14    |                                                                                                                                                                         | 25                 | 79.8                |                      |
| BAC C16    |                                                                                                                                                                         | 9.9                | 76.6                |                      |
| BAC C18    |                                                                                                                                                                         | 22.7               | 78.4                |                      |
| DADMAC C10 |                                                                                                                                                                         | 22                 | 53.7                |                      |
| DADMAC C12 |                                                                                                                                                                         | -                  | -                   |                      |
| DADMAC C14 |                                                                                                                                                                         | 3.4                | 61.6                |                      |
| DADMAC C16 |                                                                                                                                                                         | 26                 | 57.2                |                      |
| DADMAC C18 |                                                                                                                                                                         | 18.1               | 59.7                |                      |
| ATMAC C12  |                                                                                                                                                                         | -                  | -                   |                      |
| ATMAC C14  |                                                                                                                                                                         | 22                 | 100                 |                      |
| ATMAC C16  |                                                                                                                                                                         | 15.7               | 87.2                |                      |
| ATMAC C18  |                                                                                                                                                                         | 0.4                | 100                 |                      |
| *LAS-C10   |                                                                                                                                                                         | <b>A/O process</b> | <b>CAST process</b> |                      |

|           |                                                                                                                                                                    |                                                                                                                                  |                                                 |                             |                          |
|-----------|--------------------------------------------------------------------------------------------------------------------------------------------------------------------|----------------------------------------------------------------------------------------------------------------------------------|-------------------------------------------------|-----------------------------|--------------------------|
|           |                                                                                                                                                                    | 100 (autumn),<br>98.57(winter)                                                                                                   | 98.9(autumn)<br>95.13(winter)                   |                             |                          |
| *LAS-C11  | Anaerobic-oxic (A/O) and cyclic activated sludge (CAST) treatment process                                                                                          | A/O process<br>100(autumn),<br>98.17(winter)                                                                                     | CAST process<br>99.54(autumn),<br>99.48(winter) | (Zhu et al.,<br>2018)       |                          |
| *LAS-C12  |                                                                                                                                                                    | A/O process<br>100(autumn),<br>97.90(winter)                                                                                     | CAST process<br>100(autumn),<br>99.65(winter)   |                             |                          |
| *LAS-C13  |                                                                                                                                                                    | A/O process<br>100(autumn),<br>99.16(winter)                                                                                     | CAST process<br>100(autumn),<br>99.84(winter)   |                             |                          |
| BAC C12   |                                                                                                                                                                    | 100                                                                                                                              | 100                                             |                             |                          |
| BAC C14   |                                                                                                                                                                    | 100                                                                                                                              | 100                                             |                             |                          |
| ATMAC C12 |                                                                                                                                                                    | UV degradation was conducted using low- pressure Hg lamps at 254 nm in UV/PS system with PS dosage of 75.6 $\mu\text{M}$ (UV/PS) | 91                                              |                             | (Lee et al.,<br>2019)    |
| BAC       | Biodegradation was conducted in synthetically prepared wastewater samples at an initial concentrations of BAC 100 mg L <sup>-1</sup> to maximum value of 1200 mg/L | 99.3                                                                                                                             |                                                 | (Fortunato et al.,<br>2019) |                          |
| BAC C12   |                                                                                                                                                                    | <b>Bromma STP</b><br>99.83                                                                                                       | <b>RYA STP</b>                                  | <b>ÖN STP</b><br>99.72      | (Östman et al.,<br>2018) |



|                                                                                     |                                                                                                                                                                                                                                                                                |       |       |       |                              |
|-------------------------------------------------------------------------------------|--------------------------------------------------------------------------------------------------------------------------------------------------------------------------------------------------------------------------------------------------------------------------------|-------|-------|-------|------------------------------|
|                                                                                     | Bromma STP equipped with mechanical, chemical, and biological steps with nitrogen removal facility. It receives wastewater from 350,000 inhabitants                                                                                                                            |       | 99.7  |       |                              |
| BAC C14                                                                             |                                                                                                                                                                                                                                                                                | 99.14 | 99.14 | 99.2  |                              |
| ATMAC C16                                                                           |                                                                                                                                                                                                                                                                                | 99.52 | 98.96 | 99.34 |                              |
| DADMAC C10                                                                          |                                                                                                                                                                                                                                                                                | 98.62 | 99.41 | 99.23 |                              |
| Hexadecylpyridinium chloride (CPC)                                                  | Rya STP equipped with mechanical screening, primary clarifier, activated sludge treatment and nitrogen removal units serves 737,000 inhabitants<br><br>Ön STP without any nitrogen removal units treats wastewater through activated sludge and chemical unit of 96,000 people | 100   | 0.98  | 95.65 |                              |
| Tetradecyltrimethylammonium (TTAB)                                                  | Adsorption of different QACs to the activated sludge obtained from a WWTP treating poultry industry wastewater                                                                                                                                                                 | 81    |       |       | (Bergero and Lucchesi, 2018) |
| BAC C14                                                                             |                                                                                                                                                                                                                                                                                | 90    |       |       |                              |
| BAC C16                                                                             |                                                                                                                                                                                                                                                                                | 98    |       |       |                              |
| TTAB                                                                                | Biodegradation of QACs-degrading microorganisms <i>Pseudomonas putida</i>                                                                                                                                                                                                      | 90    |       |       |                              |
| Polydiallyldimethylammonium chloride-acrylic-acrylamide-hydroxyethyl acrylate (PDM) | Biodegradation of PDM was conducted in 5-L reactors in Activated sludge for varying concentration of PDM (100, 200, and 300 mg/L)                                                                                                                                              | 44.5  |       |       | (Zhao et al., 2020)          |
|                                                                                     | Biodegradation + Fenton Oxidation                                                                                                                                                                                                                                              | 85.5  |       |       |                              |

\*Linear alkylbenzene sulfonates (LASs)

**Table S6: Concentration of QACs in different types of surface water samples**

| Country               | Type of sample            | Types and concentration of QACs (µg/L) |             |        |         |            |         |            |           |           |           |           |            |            |            |            | References                       |
|-----------------------|---------------------------|----------------------------------------|-------------|--------|---------|------------|---------|------------|-----------|-----------|-----------|-----------|------------|------------|------------|------------|----------------------------------|
|                       |                           | DADMAC                                 |             |        |         |            |         |            | ATMAC     |           |           |           | BAC        |            |            |            |                                  |
|                       |                           | C10:10                                 | C12:12      | C14:14 | C14:C16 | C16:16     | C16:C18 | C18:18     | C12       | C14       | C16       | C18       | C12        | C14        | C16        | C18        |                                  |
| Taiwan                | river water               | -                                      | -           | -      | -       | -          | -       | -          |           |           |           |           | <LOD-4.2   | <LOD-0.8   | 1.2-5.3    | 2.6-55     | (Ding and Liao, 2000)            |
|                       | river water               | -                                      | -           | -      | -       | -          | -       | -          | <LOD-0.66 | <LOD-0.26 | <LOD-0.23 | <LOD-0.17 | -          | -          | -          | -          | (Ding and Tsai, 2003)            |
| USA.                  | river water               | -                                      | -           | -      | -       | -          | -       | -          | <LOD-1.34 | <LOD-2.38 |           | 2         | -          | -          | -          | -          | (Ferrer and Furlong, 2001)       |
| Poland                | water reservoir           | -                                      | -           | -      | -       | -          | -       | -          | -         | -         | -         | -         | <LOD-99.6  | <LOD-157   | <LOD-243   |            | (Olkowska et al., 2013)          |
| Austria               | river water (June 2004)   | 0.012-0.15                             | 0.011-0.022 |        | -       | <LOD-0.05  | -       | <LOD-0.19  | -         | -         | -         | -         | 0.015-1.9  | <LOQ-0.510 | <LOQ-0.110 | <LOD-0.094 | (Uhl et al., 2005)               |
|                       | river water (August 2004) | <LOD-0.120                             | -           | -      | -       | <LOD-0.021 | -       | <LOD-0.054 | -         | -         | -         | -         | <LOD-0.140 | <LOD-0.076 | <LOD-0.044 | <LOD-0.018 |                                  |
| Germany               | river water               | -                                      | -           | -      | -       | 0.11       | 0.34    | 0.41       | -         | -         | -         | -         | -          | -          | -          | -          | (Radke et al., 1999)             |
| Japan                 | river water 1998 mean     | -                                      | -           | -      | -       | 0.25       |         |            | -         | -         | -         | -         | -          | -          | -          | -          | (Miura et al., 2008)             |
|                       | river water 1999 mean     | -                                      | -           | -      | -       | 0.67       |         |            | -         | -         | -         | -         | -          | -          | -          | -          |                                  |
|                       | river water 2000 mean     | -                                      | -           | -      | -       | 0.52       |         |            | -         | -         | -         | -         | -          | -          | -          | -          |                                  |
|                       | river water 2001 mean     | -                                      | -           | -      | -       | 0.42       |         |            | -         | -         | -         | -         | -          | -          | -          | -          |                                  |
|                       | river water 2002 mean     | -                                      | -           | -      | -       | 0.54       |         |            | -         | -         | -         | -         | -          | -          | -          | -          |                                  |
|                       | river water 2003 mean     | -                                      | -           | -      | -       | 0.08       |         |            | -         | -         | -         | -         | -          | -          | -          | -          |                                  |
|                       | river water 2004 mean     | -                                      | -           | -      | -       | 0.07       |         |            | -         | -         | -         | -         | -          | -          | -          | -          |                                  |
|                       | river water 2005 mean     | -                                      | -           | -      | -       | 0.09       |         |            | -         | -         | -         | -         | -          | -          | -          | -          |                                  |
| river water 2006 mean | -                         | -                                      | -           | -      | 0.05    |            |         | -          | -         | -         | -         | -         | -          | -          | -          |            |                                  |
| England               | Seawater                  | 0.12-0.27                              | -           | -      | -       | -          | -       | -          | -         | -         | -         | -         | -          | -          | -          | -          | (Bassarab et al., 2011)          |
| France                | Stormwater samples        |                                        | 0.1-0.3     |        |         | -          |         |            | -         | -         | -         | -         | -          | -          | -          | -          | (Van De Voorde et al., 2012)     |
|                       | Roof runoff               |                                        | 6-22,593    |        |         | -          |         |            | -         | -         | -         | -         | -          | -          | -          | -          |                                  |
| Austria               | Surface water             | -                                      | -           |        | -       | -          |         |            | -         | -         | 4-19      |           | -          | -          | -          | -          | (Martínez-Carballo et al., 2007) |

#Reused from the open access publication (Mulder et al., 2018)

**Table S7: Toxicity to QACs by different aquatic species (Reused with permission from (Zhang et al., 2015) (Di Nica et al., 2017))**

| QACs                                              | Species                    | Test (endpoint) | Value(mg/L) |
|---------------------------------------------------|----------------------------|-----------------|-------------|
| Alkyltrimethylammonium halides (ATMAC C12–16)     | Daphnia magna              | IC50            | 0.13–0.38   |
|                                                   | Photobacterium phosphoreum | EC50            | 0.24–0.63   |
| DADMAC C12                                        | D. magna                   | 24 h-EC50       | 0.37        |
|                                                   | Rainbow trout              | 24 h-LC50       | 40.53       |
|                                                   | C. vulgaris                | 96 h EC50       | 0.188       |
| ATMAC C14                                         | D. magna                   | 24 h-EC50       | 0.091       |
|                                                   | Rainbow trout              | 24 h-LC50       | 2.51        |
|                                                   | C. vulgaris                | 96 h EC50       | 0.182       |
|                                                   | D. magna                   | 24 h-EC50       | 0.058       |
| ATMAC C16                                         | Rainbow trout              | 24 h-LC50       | 0.6         |
|                                                   | C. vulgaris                | 96 h EC50       | 0.156       |
|                                                   | C. vulgaris                | 96 h EC50       | 0.137       |
|                                                   | C. vulgaris                | 96 h EC50       | 0.15        |
| ATMAC C18                                         | C. vulgaris                | 96 h EC50       | 0.11        |
| Alkylbenzyltrimethylammonium halides (BAC C12–16) | Daphnia magna              | IC50            | 0.13–0.22   |
|                                                   | Photobacterium phosphoreum | EC50            | 0.15–0.55   |
| Benzalkonium chlorides (BAC)                      | P. subcapitata             | 72-h EC50       | 0.041       |
|                                                   | D. magna                   | 48-h EC50       | 0.041       |
|                                                   | B. calyciflorus            | 48-h EC50       | 0.13        |
|                                                   | T. thermophila             | 24-h EC50       | 2.94        |
| BAC C12                                           | C. vulgaris                | 96 h EC50       | 0.203       |
| BAC C14                                           | C. vulgaris                | 96 h EC50       | 0.174       |
| BAC C16                                           | C. vulgaris                | 96 h EC50       | 0.161       |
| DADMAC C14                                        | P. subcapitata             | 72-h EC50       | 0.021       |
|                                                   | D. magna                   | 48-h EC50       | 0.023       |

|            |                            |           |                   |
|------------|----------------------------|-----------|-------------------|
|            | B. calyciflorus            | 48-h EC50 | 0.025             |
|            | T. thermophila             | 24-h EC50 | 4.43              |
| BAC C12    |                            | IC10      | 0.07[0.05; 0.08]  |
|            |                            | IC50      | 0.17[0.14; 0.2]   |
| DADMAC C10 |                            | IC10      | 0.08[0.04; 0.11]  |
|            |                            | IC50      | 0.4[0.33; 0.46]   |
| ATMAC C14  | <i>Aliivibrio fischeri</i> | IC10      | 0.19 [0.11; 0.28] |
|            |                            | IC50      | 0.74 [0.63; 0.84] |
| ATMAC C16  |                            | IC10      | 0.47[0.37; 0.56]  |
|            |                            | IC50      | 0.99[0.92; 1.06]  |
| ATMAC C10  |                            | IC10      | 0.91[0.62; 1.21]  |
|            |                            | IC50      | 2.83[2.11; 3.55]  |

**Table S8: Mixture toxicity of QACs *Vibrio fischeri* species (Di Nica et al., 2017)**

| <b>QACs</b>                                | <b>Test</b> | <b>Value (mg/L)</b> |
|--------------------------------------------|-------------|---------------------|
| BAC C12+DADMAC C10                         | IC10        | 0.10 [0.07–0.12]    |
|                                            | IC50        | 0.33 [0.30–0.37]    |
| BAC C12+ATMAC C16                          | IC10        | 0.41 [0.36–0.46]    |
|                                            | IC50        | 0.95 [0.90–1.00]    |
| BAC C12+C14TAB                             | IC10        | 0.11 [0.09–0.14]    |
|                                            | IC50        | 0.36 [0.33–0.38]    |
| BAC C12+C10TAB                             | IC10        | 0.10 [0.04–0.15]    |
|                                            | IC50        | 0.98 [0.80–1.16]    |
| DADMAC C10+ATMAC-16                        | IC10        | 1.13 [1.05–1.20]    |
|                                            | IC50        | 1.58 [1.51–1.64]    |
| DADMAC C10+C14TAB                          | IC10        | 0.35 [0.27–0.42]    |
|                                            | IC50        | 1.10 [1.02–1.18]    |
| DADMAC C10+C10TAB                          | IC10        | 1.108 [ 0.79–1.43]  |
|                                            | IC50        | 4.37[ 3.87–4.87]    |
| ATMAC C16+C14TAB                           | IC10        | 0.33 [0.22–0.44]    |
|                                            | IC50        | 0.81 [0.71–0.92]    |
| ATMAC C16+C10TAB                           | IC10        | 0.87 [0.65–1.09]    |
|                                            | IC50        | 2.42 [2.20–2.63]    |
| C14TAB+C10TAB                              | IC10        | 0.38 [0.28–0.49]    |
|                                            | IC50        | 2.58 [2.37–2.79]    |
| BAC C12+DADMAC C10+ATMAC C16+C14TAB+C10TAB | IC10        | 0.68 [0.54–0.82]    |
|                                            | IC50        | 1.89 [1.74–2.05]    |

**Table S9. Effect of QAC exposure on BAC and antibiotic MICs in different bacterial species**

| Species                 | Strain(s)                                  | MIC Increase (BAC) | Antibiotic(s)    | Increase in MIC for antibiotics | Genes/proteins associated with QAC adaptation                           | References              |
|-------------------------|--------------------------------------------|--------------------|------------------|---------------------------------|-------------------------------------------------------------------------|-------------------------|
| <i>Escherichia coli</i> | ATCC 25922 and 9 avian and porcine strains | 2.6 fold           | Florfenicol      | 7 fold                          | Not tested                                                              | (Soumet et al., 2012)   |
|                         |                                            |                    | Cefotaxime       | 6.3 fold                        |                                                                         |                         |
|                         |                                            |                    | Chloramphenicol  | 6.1 fold                        |                                                                         |                         |
|                         |                                            |                    | Ceftazidime      | 4.8 fold                        |                                                                         |                         |
|                         |                                            |                    | Nalidixic acid   | 4.4 fold                        |                                                                         |                         |
|                         |                                            |                    | Ampicillin       | 4.3 fold                        |                                                                         |                         |
|                         |                                            |                    | Tetracycline     | 4.2 fold                        |                                                                         |                         |
|                         |                                            |                    | Ciprofloxacin    | 3.8 fold                        |                                                                         |                         |
|                         |                                            |                    | Sulfamethoxazole | 3.7 fold                        |                                                                         |                         |
|                         |                                            |                    | Trimethoprim     | 3.3 fold                        |                                                                         |                         |
| <i>Escherichia coli</i> | ATCC 11775                                 | 6 fold             | Ampicillin       | 5 fold                          | <i>mipA</i> , MltA, flagellin protein encoded in <i>Salmonella</i> spp. | (Langsrud et al., 2004) |
|                         |                                            |                    | Chloramphenicol  | 24 fold                         |                                                                         |                         |
|                         |                                            |                    | Erythromycin     | 1.28 fold                       |                                                                         |                         |
|                         |                                            |                    | Gentamicin       | 2 fold                          |                                                                         |                         |
|                         |                                            |                    | Kanamycin        | 2 fold                          |                                                                         |                         |
|                         |                                            |                    | Nalidixic acid   | 3.75 fold                       |                                                                         |                         |
|                         |                                            |                    | Norfloxacin      | 2.6 fold                        |                                                                         |                         |
|                         |                                            |                    | Penicillin       | 1.6 fold                        |                                                                         |                         |
| Tetracycline            | 4 fold                                     |                    |                  |                                 |                                                                         |                         |

|                           |                           |          |                 |                                              |                                                                                                                                                    |                         |
|---------------------------|---------------------------|----------|-----------------|----------------------------------------------|----------------------------------------------------------------------------------------------------------------------------------------------------|-------------------------|
|                           | DSM 682                   | 6 fold   | Ampicillin      | 4 fold                                       |                                                                                                                                                    | (Langsrud et al., 2004) |
|                           |                           |          | Chloramphenicol | 12 fold                                      |                                                                                                                                                    |                         |
|                           |                           |          | Erythromycin    | 1.6 fold                                     |                                                                                                                                                    |                         |
|                           |                           |          | Gentamicin      | 2 fold                                       |                                                                                                                                                    |                         |
|                           |                           |          | Kanamycin       | –                                            |                                                                                                                                                    |                         |
|                           |                           |          | Nalidixic acid  | 7.5 fold                                     |                                                                                                                                                    |                         |
|                           |                           |          | Norfloxacin     | 1.5 fold                                     |                                                                                                                                                    |                         |
|                           |                           |          | Penicillin      | 2 fold                                       |                                                                                                                                                    |                         |
|                           |                           |          | Tetracycline    | 1.5 fold                                     |                                                                                                                                                    |                         |
|                           | ATCC 47076                | 6–7 fold | Chloramphenicol | 116 fold                                     | <i>soxS, marA, nfnB, ybjC, fldA, zwf, gcd, gapA, yeeF, yhiY, acrA, acrB, tolC, NfnB, Ssb, MnSOD, MdaB, FumC, WrbA, Dps, RpsF, OmpA,F,T,C, FecA</i> | (Bore et al., 2007)     |
| Florfenicol               | 2–8 fold                  |          |                 |                                              |                                                                                                                                                    |                         |
| Ciprofloxacin             | 4.16 fold                 |          |                 |                                              |                                                                                                                                                    |                         |
| Nalidixic acid            | 4–8 fold                  |          |                 |                                              |                                                                                                                                                    |                         |
| Ampicillin                | 2 fold                    |          |                 |                                              |                                                                                                                                                    |                         |
| Cefotaxime                | 2–8.3 fold                |          |                 |                                              |                                                                                                                                                    |                         |
| <i>Klebsiella oxytoca</i> | Strain from organic foods | 3 fold   | Ampicillin      | No cross-tolerance to all antibiotics tested | <i>acrB, sugE, n orC, qacE, qacH,</i>                                                                                                              | Gadea et al., 2017      |
| Cefotaxime                |                           |          |                 |                                              |                                                                                                                                                    |                         |
| Ciprofloxacin             |                           |          |                 |                                              |                                                                                                                                                    |                         |

|                              |                                |            |                              |             |                                                                                                                                 |                         |
|------------------------------|--------------------------------|------------|------------------------------|-------------|---------------------------------------------------------------------------------------------------------------------------------|-------------------------|
|                              |                                |            | Imipenem                     |             | aac(6 <sub>2</sub> )-Ie-aph(2 <sub>2</sub> )-Ia, aph(2 <sub>2</sub> )-Ic, ant(4 <sub>2</sub> )-Ia, lsa, mrsA/B, ereA, ermB, cat |                         |
|                              |                                |            | Ceftazidime                  |             |                                                                                                                                 |                         |
|                              |                                |            | Tetracycline                 |             |                                                                                                                                 |                         |
|                              |                                |            | Trimethoprim-Sulfamethoxazol |             |                                                                                                                                 |                         |
|                              |                                |            | Sulfamethoxazol              |             |                                                                                                                                 |                         |
|                              |                                |            | Nalidixic acid               |             |                                                                                                                                 |                         |
| <i>Chryseobacterium spp.</i> | Strain from organic foods      | 20 fold    | Ampicillin                   |             |                                                                                                                                 |                         |
| <i>Enterobacter cloacae</i>  | Two strains from organic foods | 12–30 fold | Cefotaxime                   |             |                                                                                                                                 |                         |
|                              |                                |            | Ampicillin                   |             |                                                                                                                                 |                         |
| <i>Enterobacter ludwigii</i> | Strain from organic foods      | 30 fold    | Cefotaxime                   |             |                                                                                                                                 |                         |
| <i>Staphylococcus aureus</i> | Five strains                   | 2 fold     | Oxacillin                    | 4–32 fold   | Not tested                                                                                                                      | (Akimitsu et al., 1999) |
|                              |                                |            | Cloxacillin                  | 0–1024 fold |                                                                                                                                 |                         |
|                              |                                |            | Moxalactam                   | 4–16 fold   |                                                                                                                                 |                         |
|                              |                                |            | Flomoxef                     | 2–16 fold   |                                                                                                                                 |                         |
|                              |                                |            | Cefmetazole                  | 4–16 fold   |                                                                                                                                 |                         |
|                              |                                |            | Cefazolin                    | 0–2 fold    |                                                                                                                                 |                         |
|                              |                                |            | Cephalothin                  | 2 fold      |                                                                                                                                 |                         |
|                              |                                |            | Ampicillin                   | 0–2 fold    |                                                                                                                                 |                         |
|                              |                                |            | Chloramphenicol              | –           |                                                                                                                                 |                         |
|                              |                                |            | Ofloxacin                    | 2–4 fold    |                                                                                                                                 |                         |
| Tetracycline                 | –                              |            |                              |             |                                                                                                                                 |                         |



|                               |                                                                                        |            |                 |          |             |                 |
|-------------------------------|----------------------------------------------------------------------------------------|------------|-----------------|----------|-------------|-----------------|
|                               |                                                                                        |            | Kanamycin       | 0–2 fold |             |                 |
| <i>Listeria monocytogenes</i> | Twenty-five strains from cooked meat, raw vegetables, and food production environments | 0.5–5 fold | Ampicillin      | –        | <i>mdrL</i> | Yu et al., 2018 |
|                               |                                                                                        |            | Cefotaxime      | 2–8 fold |             |                 |
|                               |                                                                                        |            | Cephalothin     | 2–8 fold |             |                 |
|                               |                                                                                        |            | Chloramphenicol | –        |             |                 |
|                               |                                                                                        |            | Ciprofloxacin   | 2–4 fold |             |                 |
|                               |                                                                                        |            | Erythromycin    | –        |             |                 |
|                               |                                                                                        |            | Kanamycin       | –        |             |                 |
|                               |                                                                                        |            | Tetracycline    | –        |             |                 |

## References

- Ansaldi, F., Banfi, F., Morelli, P., Valle, L., Durando, P., Sticchi, L., Contos, S., Gasparini, R., Crovari, P., 2004. SARS-CoV, influenza A and syncytial respiratory virus resistance against common disinfectants and ultraviolet irradiation. *J. Prev. Med. Hyg.* 45, 5–8.
- Bassarab, P., Williams, D., Dean, J.R., Ludkin, E., Perry, J.J., 2011. Determination of quaternary ammonium compounds in seawater samples by solid-phase extraction and liquid chromatography-mass spectrometry. *J. Chromatogr. A* 1218, 673–677. <https://doi.org/10.1016/J.CHROMA.2010.11.088>
- Bergero, M.F., Lucchesi, G.I., 2018. Degradation of cationic surfactants using immobilized bacteria: Its effect on adsorption to activated sludge. *J. Biotechnol.* 272–273, 1–6. <https://doi.org/10.1016/j.jbiotec.2018.03.003>
- Dellanno, C., Vega, Q., Boesenberg, D., 2009. The antiviral action of common household disinfectants and antiseptics against murine hepatitis virus, a potential surrogate for SARS coronavirus. *Am. J. Infect. Control* 37, 649–652. <https://doi.org/10.1016/J.AJIC.2009.03.012>
- Di Nica, V., Gallet, J., Villa, S., Mezzanotte, V., 2017. Toxicity of Quaternary Ammonium Compounds (QACs) as single compounds and mixtures to aquatic non-target microorganisms: Experimental data and predictive models. *Ecotoxicol. Environ. Saf.* 142, 567–577. <https://doi.org/10.1016/J.ECOENV.2017.04.028>
- Ding, W.H., Liao, Y.H., 2000. Determination of Alkylbenzyltrimethylammonium Chlorides in River Water and Sewage Effluent by Solid-Phase Extraction and Gas Chromatography/Mass Spectrometry. *Anal. Chem.* 73, 36–40. <https://doi.org/10.1021/AC000655I>
- Ding, W.H., Tsai, P.C., 2003. Determination of Alkyltrimethylammonium Chlorides in River Water by Gas Chromatography/Ion Trap Mass Spectrometry with Electron Impact and Chemical Ionization. *Anal. Chem.* 75, 1792–1797. <https://doi.org/10.1021/AC020536Y>
- Ferrer, I., Furlong, E.T., 2001. Identification of Alkyl Dimethylbenzylammonium Surfactants in Water Samples by Solid-Phase Extraction Followed by Ion Trap LC/MS and LC/MS/MS. *Environ. Sci. Technol.* 35, 2583–2588. <https://doi.org/10.1021/ES001742V>
- Fortunato, M.S., Baroni, S., González, A.J., Álvarez Roncancio, J.D., Storino, A., Parise, C., Planes, E., Gallego, A., Korol, S.E., 2019. Biodegradation and Detoxification of Benzalkonium Chloride in Synthetic and Industrial Effluents in Upflow Biofilm Aerobic Reactors. *Water. Air. Soil Pollut.* 230. <https://doi.org/10.1007/s11270-019-4126-9>
- Lee, M.Y., Wang, W.L., Xu, Z. Bin, Ye, B., Wu, Q.Y., Hu, H.Y., 2019. The application of UV/PS oxidation for removal of a quaternary ammonium compound of dodecyl trimethyl ammonium chloride (DTAC): The kinetics and mechanism. *Sci. Total Environ.* 655, 1261–1269. <https://doi.org/10.1016/j.scitotenv.2018.11.256>
- Martínez-Carballo, E., González-Barreiro, C., Sitka, A., Kreuzinger, N., Scharf, S., Gans, O., 2007. Determination of selected quaternary ammonium compounds by liquid chromatography with mass spectrometry. Part II. Application to sediment and sludge samples in Austria. *Environ. Pollut.* 146, 543–547. <https://doi.org/10.1016/J.ENVPOL.2006.07.016>
- Miura, K., Nishiyama, N., Yamamoto, A., 2008. Aquatic environmental monitoring of

- detergent surfactants. *J. Oleo Sci.* 57, 161–170. <https://doi.org/10.5650/JOS.57.161>
- Mulder, I., Siemens, J., Sentek, V., Amelung, W., Smalla, K., Jechalke, S., 2018. Quaternary ammonium compounds in soil: implications for antibiotic resistance development. *Rev. Environ. Sci. Biotechnol.* 17, 159–185. <https://doi.org/10.1007/s11157-017-9457-7>
- Olkowska, E., Polkowska, Z., Namieśnik, J., 2013. A solid phase extraction-ion chromatography with conductivity detection procedure for determining cationic surfactants in surface water samples. *Talanta* 116, 210–216. <https://doi.org/10.1016/J.TALANTA.2013.04.083>
- Östman, M., Fick, J., Tysklind, M., 2018. Detailed mass flows and removal efficiencies for biocides and antibiotics in Swedish sewage treatment plants. *Sci. Total Environ.* 640–641, 327–336. <https://doi.org/10.1016/j.scitotenv.2018.05.304>
- Pratelli, A., 2007. Action of Disinfectants on Canine Coronavirus Replication In Vitro. *Zoonoses Public Health* 54, 383–386. <https://doi.org/10.1111/J.1863-2378.2007.01079.X>
- Rabenau, H.F., Kampf, G., Cinatl, J., Doerr, H.W., 2005. Efficacy of various disinfectants against SARS coronavirus. *J. Hosp. Infect.* 61, 107–111. <https://doi.org/10.1016/j.jhin.2004.12.023>
- Radke, M., Behrends, T., Förster, J., Herrmann, R., 1999. Analysis of Cationic Surfactants by Microbore High-Performance Liquid Chromatography–Electrospray Mass Spectrometry. *Anal. Chem.* 71, 5362–5366. <https://doi.org/10.1021/AC990453Q>
- Sattar, S.A., Springthorpe, V.S., Karim, Y., Loro, P., 1989. Chemical disinfection of non-porous inanimate surfaces experimentally contaminated with four human pathogenic viruses. *Epidemiol. Infect.* 102, 493–505. <https://doi.org/10.1017/S0950268800030211>
- Schmidt, A., Wolff, M., Weber, O., 2005. Coronaviruses with Special Emphasis on First Insights Concerning SARS - Google Books. New York.
- Schrank, C.L., Minbiole, K.P.C., Wuest, W.M., 2020. Are Quaternary Ammonium Compounds, the Workhorse Disinfectants, Effective against Severe Acute Respiratory Syndrome-Coronavirus-2? *ACS Infect. Dis.* 6, 1553–1557. <https://doi.org/10.1021/acsinfecdis.0c00265>
- Tomei, M.C., Mosca Angelucci, D., Mascolo, G., Kunkel, U., 2019. Post-aerobic treatment to enhance the removal of conventional and emerging micropollutants in the digestion of waste sludge. *Waste Manag.* 96, 36–46. <https://doi.org/10.1016/J.WASMAN.2019.07.013>
- Uhl, M., Gans, O., Grillitsch, B., Fürhacker, M., Kreuzinger, N., 2005. Grundlagen zur Risikoabschätzung für quaternäre Ammoniumverbindungen.
- Van De Voorde, A., Lorgeoux, C., Gromaire, M.C., Chebbo, G., 2012. Analysis of quaternary ammonium compounds in urban stormwater samples. *Environ. Pollut.* 164, 150–157. <https://doi.org/10.1016/J.ENVPOL.2012.01.037>
- Wood, A., Payne, D., 1998. The action of three antiseptics/disinfectants against enveloped and non-enveloped viruses 38. [https://doi.org/10.1016/S0195-6701\(98\)90077-9](https://doi.org/10.1016/S0195-6701(98)90077-9)
- Zhang, C., Cui, F., Zeng, G. ming, Jiang, M., Yang, Z. zhu, Yu, Z. gang, Zhu, M. ying, Shen, L. qing, 2015. Quaternary ammonium compounds (QACs): A review on occurrence, fate and toxicity in the environment. *Sci. Total Environ.* 518–519, 352–362.

<https://doi.org/10.1016/j.scitotenv.2015.03.007>

Zhao, X., Chen, L., Ma, H., Ma, J., Gao, D., 2020. Effective removal of polymer quaternary ammonium salt by biodegradation and a subsequent Fenton oxidation process. *Ecotoxicol. Environ. Saf.* 188, 109919. <https://doi.org/10.1016/j.ecoenv.2019.109919>

Zheng, G., Filippelli, G.M., Salamova, A., 2020. Increased Indoor Exposure to Commonly Used Disinfectants during the COVID-19 Pandemic. *Environ. Sci. Technol. Lett.* 7, 760–765. <https://doi.org/10.1021/acs.estlett.0c00587>

Zhu, F.J., Ma, W.L., Xu, T.F., Ding, Y., Zhao, X., Li, W.L., Liu, L.Y., Song, W.W., Li, Y.F., Zhang, Z.F., 2018. Removal characteristic of surfactants in typical industrial and domestic wastewater treatment plants in Northeast China. *Ecotoxicol. Environ. Saf.* 153, 84–90. <https://doi.org/10.1016/j.ecoenv.2018.02.001>
